# Supplementary material for: Guideline for reporting systematic reviews of outcome measurement instruments (OMIs): PRISMA-COSMIN for OMIs 2024
Source: PubMed Central journal article supplement (PMC11231111; doi:10.1186/s41687-024-00727-7), 2024-07-09
Supplement: 41687_2024_727_MOESM2_ESM.pdf [file 41687_2024_727_MOESM2_ESM.pdf]

**Guideline for reporting systematic reviews of outcome measurement instruments (OMIs):  
PRISMA-COSMIN for OMIs 2024**

Ellen BM Elsman, Lidwine B Mokkink, Caroline B Terwee, Dorcas Beaton, Joel J Gagnier, Andrea C Tricco, Ami Baba, Nancy J Butcher, Maureen Smith, Catherine Hofstetter, Olalekan Lee Aiyegbusi, Anna Berardi, Julie Farmer, Kirstie L Haywood, Karolin R Krause, Sarah Markham, Evan Mayo-Wilson, Ava Mehdipour, Juanna Ricketts†, Peter Szatmari, Zahi Touma, David Moher, & Martin Offringa  
[martin.offringa@sickkids.ca](mailto:martin.offringa@sickkids.ca)

**Online Resource 2.** Group membership for the PRISMA-COSMIN for OMIs 2024 guideline

| <b>Name</b>            | <b>Country</b> | <b>Group</b>             | <b>Contribution</b>                                                                                                                               |
|------------------------|----------------|--------------------------|---------------------------------------------------------------------------------------------------------------------------------------------------|
| Ellen Elsman           | Canada         | Steering committee       | Project lead; responsible for preparation, data collection, data analyses, dissemination of results                                               |
| Wieneke Mokkink        | Netherlands    | Steering committee       | Project oversight and supervision; workgroup meeting participant; drafted explanation & elaboration document                                      |
| Caroline Terwee        | Netherlands    | Steering committee       | Project oversight and supervision; workgroup meeting participant; drafted explanation & elaboration document                                      |
| Dorcas Beaton          | Canada         | Steering committee       | Delphi panelist; joined steering committee after Delphi study; workgroup meeting participant; drafted explanation & elaboration document          |
| Joel Gagnier           | Canada         | Steering committee       | Project oversight; workgroup meeting participant; drafted explanation & elaboration document                                                      |
| Andrea Tricco          | Canada         | Steering committee       | Project oversight; workgroup meeting participant; drafted explanation & elaboration document                                                      |
| Nancy Butcher          | Canada         | Steering committee       | Study conception; grant acquisition                                                                                                               |
| Maureen Smith          | Canada         | Steering committee       | Patient partner; project oversight; Delphi panelist; workgroup meeting participant; drafted explanation & elaboration document                    |
| David Moher            | Canada         | Steering committee       | Grant acquisition; project oversight; workgroup meeting participant; drafted explanation & elaboration document                                   |
| Martin Offringa        | Canada         | Steering committee       | Study conception; grant acquisition; project oversight and supervision; workgroup meeting participant; drafted explanation & elaboration document |
| Ami Baba               | Canada         | Project manager          | Project oversight and management                                                                                                                  |
| Olalekan Lee Aiyegbusi | UK             | Technical advisory group | Delphi panelist; workgroup meeting participant; drafted explanation & elaboration document                                                        |
| Cornelia Borkhoff      | Canada         | Technical advisory group | Delphi panelist; workgroup meeting participant                                                                                                    |
| Suneeta Monga          | Canada         | Technical advisory group | Grant acquisition                                                                                                                                 |
| Karen Wong             | Canada         | Technical advisory group | Grant acquisition                                                                                                                                 |
| Anne Klassen           | Canada         | Technical advisory group | Grant acquisition                                                                                                                                 |
| Carolina Barnett-Tapia | Canada         | Technical advisory group | Grant acquisition                                                                                                                                 |
| Karolin Krause         | Canada         | Technical advisory group | Delphi panelist; workgroup meeting participant; drafted explanation & elaboration document                                                        |

|                      |        |                               |                                                                                                                                                                   |
|----------------------|--------|-------------------------------|-------------------------------------------------------------------------------------------------------------------------------------------------------------------|
| Elizabeth Potter     | Canada | Technical advisory group      | Delphi panelist; workgroup meeting participant                                                                                                                    |
| Andrea Monsour       | Canada | Technical advisory group      | Grant acquisition                                                                                                                                                 |
| Ava Mehdipour        | Canada | Workgroup meeting participant | Delphi panelist; workgroup meeting participant; drafted explanation & elaboration document                                                                        |
| Evan Mayo-Wilson     | USA    | Workgroup meeting participant | Delphi panelist; workgroup meeting participant; drafted explanation & elaboration document                                                                        |
| Julie Farmer         | Canada | Workgroup meeting participant | Delphi panelist; workgroup meeting participant; drafted explanation & elaboration document                                                                        |
| Anna Berardi         | Italy  | Workgroup meeting participant | Delphi panelist; workgroup meeting participant; drafted explanation & elaboration document                                                                        |
| Kirstie Haywood      | UK     | Workgroup meeting participant | Delphi panelist; workgroup meeting participant; drafted explanation & elaboration document                                                                        |
| Zahi Touma           | Canada | Workgroup meeting participant | Workgroup meeting participant; drafted explanation & elaboration document                                                                                         |
| Peter Szatmari       | Canada | Workgroup meeting participant | Delphi panelist; workgroup meeting participant; drafted explanation & elaboration document                                                                        |
| Kathleen Wyrwich     | USA    | Workgroup meeting participant | Delphi panelist; workgroup meeting participant                                                                                                                    |
| Sarah Markham        | UK     | Workgroup meeting participant | Patient/public contributor; Delphi panelist; workgroup meeting participant; drafted explanation & elaboration document                                            |
| Juanna Ricketts†     | Canada | Workgroup meeting participant | Patient/public contributor; Delphi panelist; workgroup meeting participant; drafted explanation & elaboration document                                            |
| Catherine Hofstetter | Canada | Workgroup meeting participant | Patient/public contributor; Delphi panelist; accepted advisory role after Delphi study; workgroup meeting participant; drafted explanation & elaboration document |

†Juanna Ricketts has been a valued patient contributor who recently passed away
