# Supplementary material for: Guideline for reporting systematic reviews of outcome measurement instruments (OMIs): PRISMA-COSMIN for OMIs 2024
Source: PubMed Central journal article supplement (PMC11231111; doi:10.1186/s41687-024-00727-7), 2024-07-09

**Guideline for reporting systematic reviews of outcome measurement instruments (OMIs):  
PRISMA-COSMIN for OMIs 2024**

Ellen BM Elsman, Lidwine B Mokkink, Caroline B Terwee, Dorcas Beaton, Joel J Gagnier, Andrea C Tricco, Ami Baba, Nancy J Butcher, Maureen Smith, Catherine Hofstetter, Olalekan Lee Aiyegbusi, Anna Berardi, Julie Farmer, Kirstie L Haywood, Karolin R Krause, Sarah Markham, Evan Mayo-Wilson, Ava Mehdipour, Juanna Ricketts†, Peter Szatmari, Zahi Touma, David Moher, & Martin Offringa  
[martin.offringa@sickkids.ca](mailto:martin.offringa@sickkids.ca)

**Online Resource 3. Participant flow for the Delphi study (A) and pilot testing (B)**

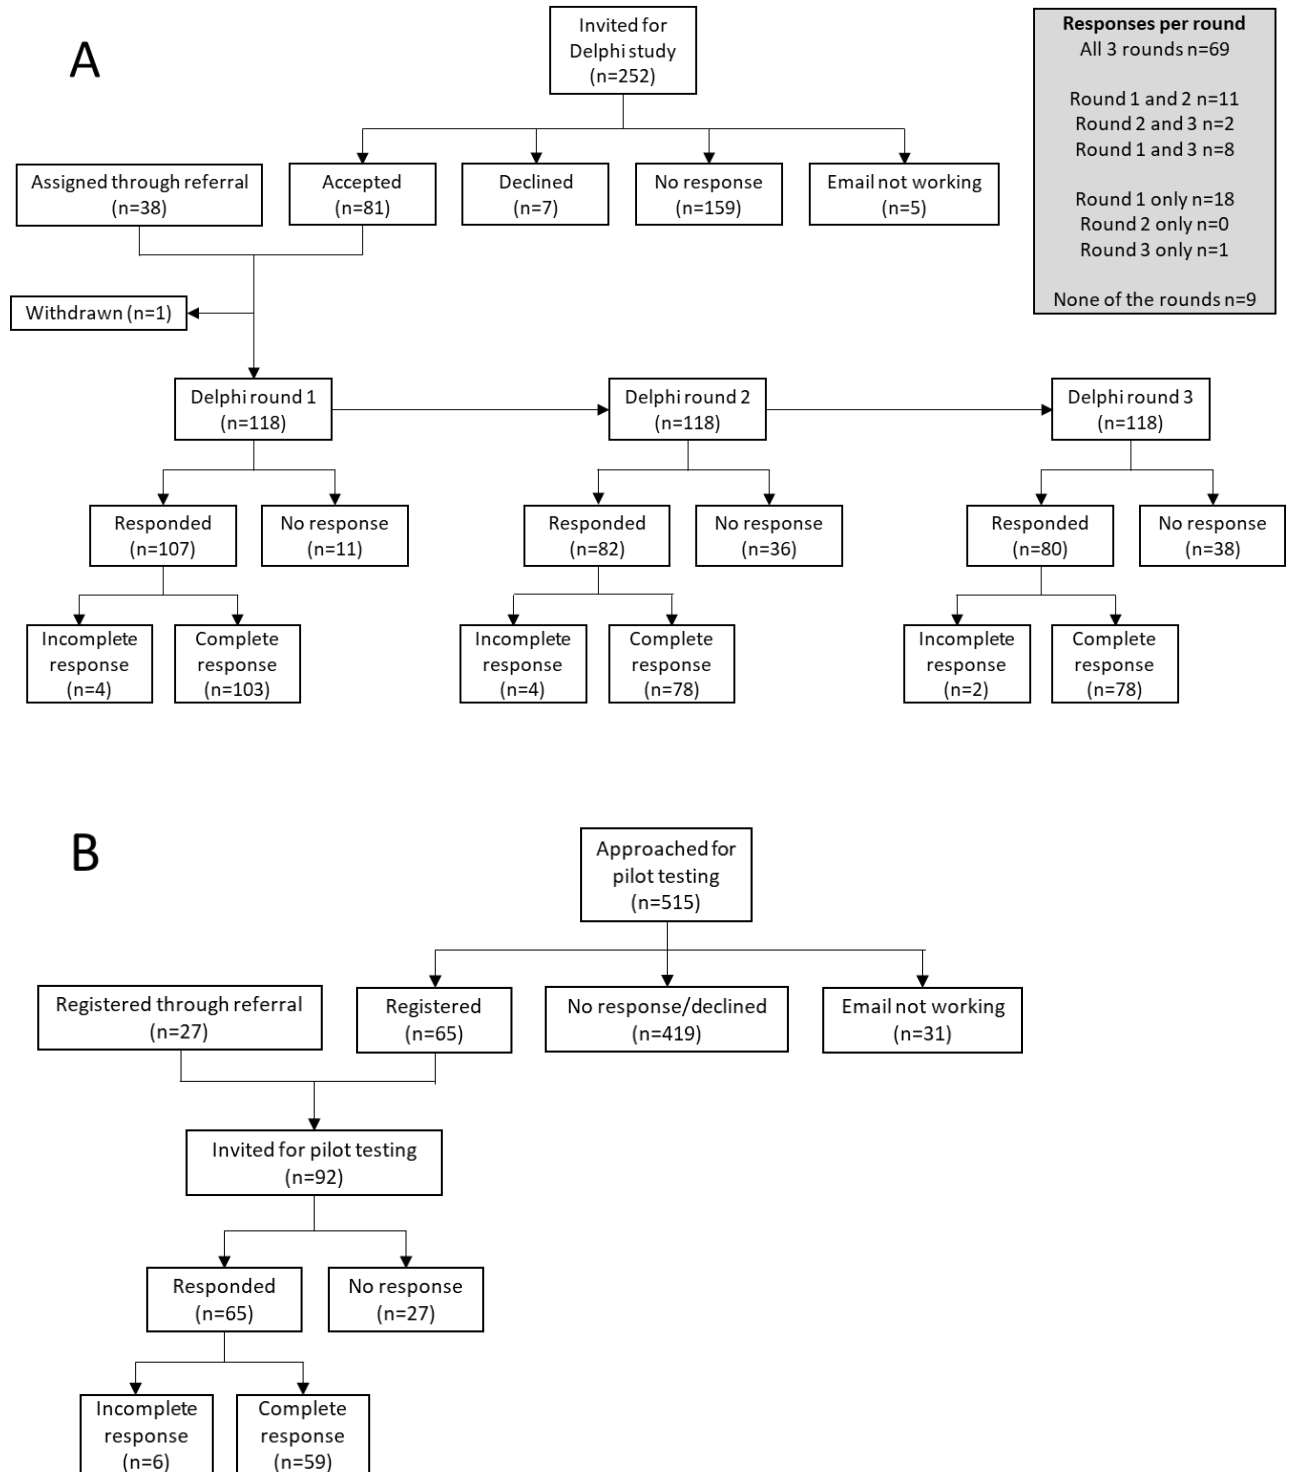

Supplement: 41687_2024_727_MOESM3_ESM.pdf [file 41687_2024_727_MOESM3_ESM.pdf]
